# Supplementary material
Source: MDPI journal article supplement (https://www.mdpi.com/2077-0472/13/5/1025)
Supplement: s1 [file s1]

Supplementary files

# Heterosis Studies for Root-Yield-Attributing Characters and Total Alkaloid Content over Different Environments in *Withania somnifera* L.

Iqbal Ahmed <sup>1</sup>, Rajendra Babu Dubey <sup>1</sup>, Devendra Jain <sup>2\*</sup>, Mohamed A. El-Sheikh <sup>3</sup> and Prashant Kaushik <sup>4</sup>

<sup>1</sup> Department of Genetics and Plant Breeding, Rajasthan College of Agriculture, Maharana Pratap University of Agriculture and Technology, Udaipur, India

<sup>2</sup> Department of Molecular Biology and Biotechnology, Rajasthan College of Agriculture, Maharana Pratap University of Agriculture and Technology, Udaipur, India

<sup>3</sup> Botany and Microbiology Department, College of Science, King Saud University, Riyadh, Saudi Arabia

<sup>4</sup> Instituto de Conservación y Mejora de la Agrodiversidad Valenciana, Universitat Politècnica de València, 46022 Valencia, Spain

\* Correspondence: devroshan@gmail.com or devendrajain@mpuat.ac.in; Tel.: +91-992-984-0357

**Supplementary data sheet Table S1:** Extent of heterosis for number of secondary branches per plant

| SN. | Crosses                          | Heterosis      |                |                |          | Heterobeltiosis |                |                |         | Economic Heterosis |                |                |         |
|-----|----------------------------------|----------------|----------------|----------------|----------|-----------------|----------------|----------------|---------|--------------------|----------------|----------------|---------|
|     |                                  | E <sub>1</sub> | E <sub>2</sub> | E <sub>3</sub> | Pool     | E <sub>1</sub>  | E <sub>2</sub> | E <sub>3</sub> | Pool    | E <sub>1</sub>     | E <sub>2</sub> | E <sub>3</sub> | Pool    |
| 1.  | L <sub>1</sub> × T <sub>1</sub>  | 24.83**        | 9.16**         | 3.21           | 12.21**  | 11.84**         | 0.88           | 3.19           | 5.31**  | -                  | -              | -              | -       |
| 2.  | L <sub>2</sub> × T <sub>1</sub>  | 30.40**        | 16.58**        | 19.12**        | 21.80**  | 22.95**         | 10.54**        | -              | 10.39** | -                  | -              | -              | -       |
| 3.  | L <sub>3</sub> × T <sub>1</sub>  | 31.41**        | 25.45**        | 26.25**        | 27.64**  | 30.48**         | 19.60**        | 11.88**        | 20.15** | -                  | -              | -              | -       |
| 4.  | L <sub>4</sub> × T <sub>1</sub>  | 29.91**        | 15.00**        | 16.61**        | 20.31**  | 20.05**         | 2.94           | -              | 6.24**  | -                  | -              | -              | -       |
| 5.  | L <sub>5</sub> × T <sub>1</sub>  | 24.77**        | 6.05**         | 19.13**        | 16.23**  | 2.16            | -              | 7.63**         | -       | -                  | -              | 1.88           | -       |
| 6.  | L <sub>6</sub> × T <sub>1</sub>  | 18.95**        | 21.33**        | 14.86**        | 18.30**  | 13.00**         | -              | -              | 2.21    | -                  | -              | -              | -       |
| 7.  | L <sub>7</sub> × T <sub>1</sub>  | 21.85**        | 23.20**        | 24.93**        | 23.34**  | 21.27**         | 14.64**        | 10.71**        | 15.60** | -                  | -              | -              | -       |
| 8.  | L <sub>8</sub> × T <sub>1</sub>  | 20.98**        | 4.43           | 0.92           | 8.43**   | 12.11**         | -              | 0.04           | 3.34    | -                  | -              | -              | -       |
| 9.  | L <sub>9</sub> × T <sub>1</sub>  | 25.00**        | 15.03**        | 13.32**        | 17.65**  | -               | -              | -              | -       | 6.32**             | 7.78**         | 7.56**         | 7.21**  |
| 10. | L <sub>10</sub> × T <sub>1</sub> | 26.11**        | 23.98**        | 10.49**        | 20.07**  | 26.05**         | 16.75**        | -              | 13.13** | -                  | -              | -              | -       |
| 11. | L <sub>11</sub> × T <sub>1</sub> | 29.23**        | 22.40**        | 19.65**        | 23.63**  | 18.33**         | 10.41**        | -              | 8.88**  | -                  | -              | -              | -       |
| 12. | L <sub>12</sub> × T <sub>1</sub> | 27.88**        | 11.93**        | 17.23**        | 18.68**  | 27.67**         | 9.70**         | 9.34**         | 16.57** | -                  | -              | -              | -       |
| 13. | L <sub>13</sub> × T <sub>1</sub> | 19.58**        | 16.27**        | 6.75*          | 13.87**  | 12.57**         | 1.04           | -              | 3.28    | -                  | -              | -              | -       |
| 14. | L <sub>14</sub> × T <sub>1</sub> | 16.96**        | 12.34**        | 5.62*          | 11.54**  | -               | -              | -              | -       | 3.76               | -              | 3.92           | 1.98    |
| 15. | L <sub>15</sub> × T <sub>1</sub> | -19.27**       | -11.88**       | 1.22           | -10.05** | -               | -              | -              | -       | -                  | -              | -              | -       |
| 16. | L <sub>1</sub> × T <sub>2</sub>  | 4.60           | 7.88**         | 9.06**         | 7.17**   | 4.27            | 7.29*          | 3.64           | 5.46**  | -                  | -              | -              | -       |
| 17. | L <sub>2</sub> × T <sub>2</sub>  | 22.99**        | 9.38**         | 29.09**        | 20.21**  | 4.35            | -              | 3.60           | 1.56    | -                  | -              | -              | -       |
| 18. | L <sub>3</sub> × T <sub>2</sub>  | 13.65**        | 19.58**        | 14.02**        | 15.78**  | 0.90            | 6.30*          | -              | 1.26    | -                  | -              | -              | -       |
| 19. | L <sub>4</sub> × T <sub>2</sub>  | 28.90**        | 32.80**        | 33.70**        | 31.80**  | 7.46*           | 11.41**        | 7.42*          | 8.76**  | -                  | -              | -              | -       |
| 20. | L <sub>5</sub> × T <sub>2</sub>  | 23.16**        | 14.05**        | 24.36**        | 20.30**  | 11.48**         | -              | 17.91**        | 8.28**  | 6.96**             | 10.72**        | 11.61**        | 9.72**  |
| 21. | L <sub>6</sub> × T <sub>2</sub>  | 23.71**        | 26.43**        | 23.49**        | 24.51**  | 5.66            | -              | -              | 0.71    | -                  | -              | -              | -       |
| 22. | L <sub>7</sub> × T <sub>2</sub>  | 16.52**        | 12.70**        | 18.69**        | 15.97**  | 4.53            | -              | 0.62           | 1.02    | -                  | -              | -              | -       |
| 23. | L <sub>8</sub> × T <sub>2</sub>  | 23.86**        | 22.59**        | 6.84*          | 17.73**  | 19.03**         | 20.89**        | 2.37           | 14.01** | -                  | -              | -              | -       |
| 24. | L <sub>9</sub> × T <sub>2</sub>  | -2.45          | -2.57          | 2.79           | -0.77    | -               | -              | -              | -       | -                  | -              | 1.91           | -       |
| 25. | L <sub>10</sub> × T <sub>2</sub> | 10.51**        | 5.82*          | 15.41**        | 10.56**  | -               | -              | -              | -       | -                  | -              | -              | -       |
| 26. | L <sub>11</sub> × T <sub>2</sub> | 16.83**        | 18.68**        | 22.66**        | 19.37**  | -               | 0.26           | -              | -       | -                  | -              | -              | -       |
| 27. | L <sub>12</sub> × T <sub>2</sub> | 15.92**        | 5.63*          | 9.18**         | 10.13**  | 3.41            | 0.00           | -              | 0.15    | -                  | -              | -              | -       |
| 28. | L <sub>13</sub> × T <sub>2</sub> | 21.56**        | 13.40**        | 12.66**        | 15.83**  | 3.00            | -              | -              | -       | -                  | -              | -              | -       |
| 29. | L <sub>14</sub> × T <sub>2</sub> | 17.27**        | 25.33**        | 15.82**        | 19.34**  | -               | 10.63**        | -              | 2.09    | 13.75**            | 16.83**        | 18.86**        | 16.43** |
| 30. | L <sub>15</sub> × T <sub>2</sub> | 22.80**        | 21.16**        | 17.88**        | 20.67**  | 10.79**         | 11.48**        | 15.75**        | 12.53** | 7.08**             | 7.25**         | 1.88           | 5.45**  |
| 31. | L <sub>1</sub> × T <sub>3</sub>  | 0.32           | -6.34**        | -0.64          | -2.25    | -               | -              | -              | -       | -                  | -              | -              | -       |
| 32. | L <sub>2</sub> × T <sub>3</sub>  | 1.73           | -6.60**        | -3.52          | -2.82*   | -               | -              | -              | -       | -                  | -              | -              | -       |
| 33. | L <sub>3</sub> × T <sub>3</sub>  | -6.71**        | -12.41**       | -14.58**       | -11.18** | -               | -              | -              | -       | -                  | -              | -              | -       |
| 34. | L <sub>4</sub> × T <sub>3</sub>  | 22.06**        | 20.19**        | 20.82**        | 21.03**  | -               | -              | -              | -       | 2.68               | 3.56           | 3.55           | 3.26*   |
| 35. | L <sub>5</sub> × T <sub>3</sub>  | -12.80**       | -15.78**       | -5.35**        | -11.49** | -               | -              | -              | -       | -                  | -              | 1.54           | -       |
| 36. | L <sub>6</sub> × T <sub>3</sub>  | 0.93           | 11.13**        | -1.80          | 3.33*    | -               | -              | -              | -       | -                  | -              | -              | -       |
| 37. | L <sub>7</sub> × T <sub>3</sub>  | 0.47           | -2.70          | -4.02          | -2.04    | -               | -              | -              | -       | -                  | -              | -              | -       |
| 38. | L <sub>8</sub> × T <sub>3</sub>  | -9.94**        | -14.12**       | -5.25*         | -9.80**  | -               | -              | -              | -       | -                  | -              | -              | -       |
| 39. | L <sub>9</sub> × T <sub>3</sub>  | -15.48**       | -14.96**       | -15.41**       | -15.28** | -               | -              | -              | -       | -                  | 0.18           | -              | -       |
| 40. | L <sub>10</sub> × T <sub>3</sub> | -13.44**       | -17.31**       | -12.10**       | -14.30** | -               | -              | -              | -       | -                  | -              | -              | -       |
| 41. | L <sub>11</sub> × T <sub>3</sub> | 1.17           | -7.64**        | -3.11          | -3.21*   | -               | -              | -              | -       | -                  | -              | -              | -       |
| 42. | L <sub>12</sub> × T <sub>3</sub> | -1.08          | -9.75**        | -10.07**       | -7.00**  | -               | -              | -              | -       | -                  | -              | -              | -       |
| 43. | L <sub>13</sub> × T <sub>3</sub> | -7.68**        | 1.69           | -15.30**       | -7.24**  | -               | -              | -              | -       | -                  | -              | -              | -       |
| 44. | L <sub>14</sub> × T <sub>3</sub> | -5.01**        | 0.25           | -10.64**       | -5.21**  | -               | -              | -              | -       | 10.49**            | 11.86**        | 7.38**         | 9.94**  |
| 45. | L <sub>15</sub> × T <sub>3</sub> | -19.90**       | -15.84**       | -19.76**       | -18.49** | -               | -              | -              | -       | -                  | -              | -              | -       |

\*, \*\* Significant at 5% and 1% respectively

**Supplementary data sheet Table S2:** Extent of heterosis for number of berries per plant

| SN. | Crosses                          | Heterosis      |                |                |          | Heterobeltiosis |                |                |         | Economic Heterosis |                |                |         |
|-----|----------------------------------|----------------|----------------|----------------|----------|-----------------|----------------|----------------|---------|--------------------|----------------|----------------|---------|
|     |                                  | E <sub>1</sub> | E <sub>2</sub> | E <sub>3</sub> | Pool     | E <sub>1</sub>  | E <sub>2</sub> | E <sub>3</sub> | Pool    | E <sub>1</sub>     | E <sub>2</sub> | E <sub>3</sub> | Pool    |
| 1.  | L <sub>1</sub> × T <sub>1</sub>  | -1.36          | -19.25**       | -1.41          | -7.34    | -               | -              | -              | -       | -                  | -              | -              | -       |
| 2.  | L <sub>2</sub> × T <sub>1</sub>  | -11.53         | -3.92          | 25.64**        | 3.22     | -               | -              | 10.40          | -       | -                  | -              | -              | -       |
| 3.  | L <sub>3</sub> × T <sub>1</sub>  | 24.58**        | 10.45          | 36.92**        | 23.79**  | 21.13*          | 3.71           | 18.03*         | 16.36** | -                  | -              | -              | -       |
| 4.  | L <sub>4</sub> × T <sub>1</sub>  | 8.50           | -9.69          | -20.31*        | -7.79    | -               | -              | -              | -       | -                  | -              | -              | -       |
| 5.  | L <sub>5</sub> × T <sub>1</sub>  | 25.61**        | 10.29          | 16.27**        | 17.39**  | -               | -              | -              | -       | -                  | -              | -              | -       |
| 6.  | L <sub>6</sub> × T <sub>1</sub>  | -2.83          | -11.39         | -7.75          | -7.29    | -               | -              | -              | -       | -                  | -              | -              | -       |
| 7.  | L <sub>7</sub> × T <sub>1</sub>  | -0.51          | 15.85          | -15.99         | -0.46    | -               | 3.54           | -              | -       | -                  | -              | -              | -       |
| 8.  | L <sub>8</sub> × T <sub>1</sub>  | -17.98*        | 18.98*         | -12.41         | -4.32    | -               | 13.95          | -              | -       | -                  | -              | -              | -       |
| 9.  | L <sub>9</sub> × T <sub>1</sub>  | 33.23**        | 19.27**        | -1.52          | 16.48**  | 2.29            | -              | -              | -       | -                  | -              | -              | -       |
| 10. | L <sub>10</sub> × T <sub>1</sub> | 16.72          | -36.63**       | -14.54         | -12.02*  | 15.03           | -              | -              | -       | -                  | -              | -              | -       |
| 11. | L <sub>11</sub> × T <sub>1</sub> | 13.62          | -23.97**       | -6.79          | -6.46    | 2.71            | -              | -              | -       | -                  | -              | -              | -       |
| 12. | L <sub>12</sub> × T <sub>1</sub> | 32.19**        | 40.76**        | 10.64          | 27.70**  | 31.21**         | 31.24**        | 1.70           | 21.46** | -                  | -              | -              | -       |
| 13. | L <sub>13</sub> × T <sub>1</sub> | -1.83          | -18.38*        | 24.34*         | 0.37     | -               | -              | -              | -       | -                  | -              | -              | -       |
| 14. | L <sub>14</sub> × T <sub>1</sub> | 23.98**        | 10.98*         | -7.12          | 8.94**   | -               | -              | -              | -       | -                  | -              | -              | -       |
| 15. | L <sub>15</sub> × T <sub>1</sub> | -4.55          | -17.18**       | -19.39**       | -13.83** | -               | -              | -              | -       | -                  | -              | -              | -       |
| 16. | L <sub>1</sub> × T <sub>2</sub>  | -14.54**       | 0.85           | -17.91**       | -10.40** | -               | -              | -              | -       | -                  | -              | -              | -       |
| 17. | L <sub>2</sub> × T <sub>2</sub>  | 0.32           | -12.48         | -13.35         | -8.22*   | -               | -              | -              | -       | -                  | -              | -              | -       |
| 18. | L <sub>3</sub> × T <sub>2</sub>  | -24.97**       | -8.17          | -28.37**       | -20.28** | -               | -              | -              | -       | -                  | -              | -              | -       |
| 19. | L <sub>4</sub> × T <sub>2</sub>  | 1.08           | -2.44          | -5.27          | -2.17    | -               | -              | -              | -       | -                  | -              | -              | -       |
| 20. | L <sub>5</sub> × T <sub>2</sub>  | -12.14**       | -3.65          | -13.86**       | -9.83**  | -               | -              | -              | -       | -                  | -              | -              | -       |
| 21. | L <sub>6</sub> × T <sub>2</sub>  | -24.20**       | -4.64          | -3.66          | -11.41** | -               | -              | -              | -       | -                  | -              | -              | -       |
| 22. | L <sub>7</sub> × T <sub>2</sub>  | -11.03         | -24.70**       | -25.44**       | -20.15** | -               | -              | -              | -       | -                  | -              | -              | -       |
| 23. | L <sub>8</sub> × T <sub>2</sub>  | 4.45           | -21.52**       | 0.60           | -5.21    | -               | -              | -              | -       | -                  | -              | -              | -       |
| 24. | L <sub>9</sub> × T <sub>2</sub>  | 9.74*          | -2.82          | -11.69*        | -1.52    | 6.29            | -              | -              | -       | -                  | -              | -              | -       |
| 25. | L <sub>10</sub> × T <sub>2</sub> | -13.34*        | -36.62**       | -5.40          | -19.18** | -               | -              | -              | -       | -                  | -              | -              | -       |
| 26. | L <sub>11</sub> × T <sub>2</sub> | -8.82          | -34.89**       | -18.92**       | -21.10** | -               | -              | -              | -       | -                  | -              | -              | -       |
| 27. | L <sub>12</sub> × T <sub>2</sub> | 6.33           | -14.76*        | 11.26          | 0.82     | -               | -              | -              | -       | -                  | -              | -              | -       |
| 28. | L <sub>13</sub> × T <sub>2</sub> | -2.12          | -19.36**       | -19.71*        | -13.21** | -               | -              | -              | -       | -                  | -              | -              | -       |
| 29. | L <sub>14</sub> × T <sub>2</sub> | 19.13**        | 5.57           | 8.91           | 11.16**  | 13.92**         | -              | -              | 1.98    | 7.97               | 5.85           | 8.31           | 8.44**  |
| 30. | L <sub>15</sub> × T <sub>2</sub> | 2.56           | -4.19          | -14.07*        | -4.93    | -               | -              | -              | -       | -                  | -              | -              | -       |
| 31. | L <sub>1</sub> × T <sub>3</sub>  | -2.16          | -2.55          | -8.51          | -4.26    | -               | -              | -              | -       | -                  | -              | -              | -       |
| 32. | L <sub>2</sub> × T <sub>3</sub>  | -20.52**       | 0.51           | -19.17**       | -13.07** | -               | -              | -              | -       | -                  | -              | -              | -       |
| 33. | L <sub>3</sub> × T <sub>3</sub>  | -36.73**       | -18.03**       | -27.84**       | -27.76** | -               | -              | -              | -       | -                  | -              | -              | -       |
| 34. | L <sub>4</sub> × T <sub>3</sub>  | 15.41**        | 32.45**        | 17.97**        | 22.05**  | -               | -              | -              | -       | -                  | 6.17           | -              | -       |
| 35. | L <sub>5</sub> × T <sub>3</sub>  | 3.26           | 8.22           | 0.99           | 4.19     | -               | 3.02           | -              | -       | 8.53               | 15.11**        | 8.95           | 11.95** |
| 36. | L <sub>6</sub> × T <sub>3</sub>  | -7.39          | -12.54*        | -2.37          | -7.60*   | -               | -              | -              | -       | -                  | -              | -              | -       |
| 37. | L <sub>7</sub> × T <sub>3</sub>  | -4.18          | -24.64**       | -2.49          | -10.35** | -               | -              | -              | -       | -                  | -              | -              | -       |
| 38. | L <sub>8</sub> × T <sub>3</sub>  | -17.47**       | -42.22**       | -17.59**       | -25.45** | -               | -              | -              | -       | -                  | -              | -              | -       |
| 39. | L <sub>9</sub> × T <sub>3</sub>  | 7.16           | -4.63          | 0.23           | 0.99     | -               | -              | -              | -       | 8.93               | 0.09           | 11.42*         | 7.84*   |
| 40. | L <sub>10</sub> × T <sub>3</sub> | -34.08**       | -28.15**       | -40.24**       | -33.88** | -               | -              | -              | -       | -                  | -              | -              | -       |
| 41. | L <sub>11</sub> × T <sub>3</sub> | -5.30          | -17.66**       | -29.97**       | -17.40** | -               | -              | -              | -       | -                  | -              | -              | -       |
| 42. | L <sub>12</sub> × T <sub>3</sub> | -15.87**       | -13.70*        | 10.97          | -6.65*   | -               | -              | -              | -       | -                  | -              | -              | -       |
| 43. | L <sub>13</sub> × T <sub>3</sub> | -16.70**       | -43.13**       | -25.39**       | -28.30** | -               | -              | -              | -       | -                  | -              | -              | -       |
| 44. | L <sub>14</sub> × T <sub>3</sub> | 8.92*          | 1.15           | -0.27          | 3.31     | 0.94            | 0.40           | -              | 0.56    | 12.08*             | 12.18*         | 11.18*         | 12.94** |
| 45. | L <sub>15</sub> × T <sub>3</sub> | -9.94*         | -34.31**       | -19.31**       | -21.31** | -               | -              | -              | -       | -                  | -              | -              | -       |

\*, \*\* Significant at 5% and 1% respectively

**Supplementary data sheet Table S3:** Extent of heterosis for harvest index

| SN. | Crosses                          | Heterosis      |                |                |          | Heterobeltiosis |                |                |         | Economic Heterosis |                |                |         |
|-----|----------------------------------|----------------|----------------|----------------|----------|-----------------|----------------|----------------|---------|--------------------|----------------|----------------|---------|
|     |                                  | E <sub>1</sub> | E <sub>2</sub> | E <sub>3</sub> | Pool     | E <sub>1</sub>  | E <sub>2</sub> | E <sub>3</sub> | Pool    | E <sub>1</sub>     | E <sub>2</sub> | E <sub>3</sub> | Pool    |
| 1.  | L <sub>1</sub> × T <sub>1</sub>  | -11.78         | 31.20**        | 45.06**        | 20.44**  | -               | 16.36          | 19.01          | 2.54    | -                  | 0.60           | 7.71           | -       |
| 2.  | L <sub>2</sub> × T <sub>1</sub>  | 28.74**        | 41.26**        | 9.84           | 27.08**  | 27.53*          | 24.76*         | -              | 14.75*  | -                  | 8.90           | -              | -       |
| 3.  | L <sub>3</sub> × T <sub>1</sub>  | 11.46          | -11.69         | 20.85          | 5.86     | -               | -              | 1.79           | -       | 11.42              | -              | -              | -       |
| 4.  | L <sub>4</sub> × T <sub>1</sub>  | 40.25**        | 40.31**        | 28.15*         | 36.51**  | 25.43**         | 26.95*         | 11.05          | 21.36** | 12.68              | 4.90           | -              | 2.29    |
| 5.  | L <sub>5</sub> × T <sub>1</sub>  | 33.12**        | 8.76           | 31.90**        | 23.69**  | 22.11*          | -              | 11.14          | 5.90    | 3.66               | -              | -              | -       |
| 6.  | L <sub>6</sub> × T <sub>1</sub>  | 36.80**        | 23.52*         | 44.23**        | 34.16**  | 34.19**         | 10.62          | 33.31*         | 26.33** | -                  | -              | -              | -       |
| 7.  | L <sub>7</sub> × T <sub>1</sub>  | 12.22          | -5.17          | 19.88*         | 8.63     | -               | -              | -              | -       | 13.85              | -              | -              | -       |
| 8.  | L <sub>8</sub> × T <sub>1</sub>  | 28.36**        | 27.49**        | 49.11**        | 34.26**  | 3.44            | 6.79           | 23.24*         | 10.44*  | 19.82*             | 5.79           | 9.46           | 12.25*  |
| 9.  | L <sub>9</sub> × T <sub>1</sub>  | 47.85**        | 21.73*         | 32.19**        | 34.05**  | 24.66**         | 2.82           | 11.47          | 13.10*  | 28.70**            | -              | -              | 7.89    |
| 10. | L <sub>10</sub> × T <sub>1</sub> | -7.22          | 11.36          | -10.67         | -2.44    | -               | -              | -              | -       | 11.18              | 11.15          | -              | 5.00    |
| 11. | L <sub>11</sub> × T <sub>1</sub> | 1.56           | 54.29**        | 47.28**        | 33.10**  | -               | 34.95**        | 39.05*         | 22.56** | -                  | -              | -              | -       |
| 12. | L <sub>12</sub> × T <sub>1</sub> | -20.41**       | 31.87**        | 11.31          | 5.04     | -               | 14.78          | -              | -       | -                  | 3.65           | -              | -       |
| 13. | L <sub>13</sub> × T <sub>1</sub> | -3.69          | 53.41**        | 10.40          | 18.74**  | -               | 35.88**        | -              | -       | -                  | 17.82*         | -              | -       |
| 14. | L <sub>14</sub> × T <sub>1</sub> | 7.64           | -5.99          | 43.81**        | 14.86**  | -               | -              | 12.38          | -       | -                  | -              | 15.80          | -       |
| 15. | L <sub>15</sub> × T <sub>1</sub> | 11.68          | 6.33           | 8.00           | 8.71     | -               | -              | -              | -       | -                  | -              | -              | -       |
| 16. | L <sub>1</sub> × T <sub>2</sub>  | 7.73           | 18.41*         | 8.89           | 11.59*   | -               | 9.99           | -              | 0.38    | -                  | -              | -              | -       |
| 17. | L <sub>2</sub> × T <sub>2</sub>  | 16.15          | 20.03*         | 37.45**        | 24.57**  | 11.06           | 11.01          | 26.25*         | 19.36** | -                  | -              | 4.39           | -       |
| 18. | L <sub>3</sub> × T <sub>2</sub>  | 6.77           | 0.53           | 7.17           | 4.70     | -               | -              | -              | -       | 11.15              | -              | -              | -       |
| 19. | L <sub>4</sub> × T <sub>2</sub>  | 30.93**        | 8.13           | 33.58**        | 24.08**  | 23.13*          | 2.59           | 25.23*         | 16.92** | 10.61              | -              | -              | -       |
| 20. | L <sub>5</sub> × T <sub>2</sub>  | 53.27**        | 3.57           | 26.76**        | 26.74**  | 48.07**         | -              | 15.21          | 14.70** | 25.70**            | -              | -              | 5.58    |
| 21. | L <sub>6</sub> × T <sub>2</sub>  | 54.72**        | 7.44           | 17.26          | 25.73**  | 43.99**         | 0.84           | 16.53          | 25.46** | 13.94              | -              | -              | -       |
| 22. | L <sub>7</sub> × T <sub>2</sub>  | 10.29          | -2.23          | -5.83          | 1.24     | -               | -              | -              | -       | 16.46              | -              | -              | -       |
| 23. | L <sub>8</sub> × T <sub>2</sub>  | 12.03          | 3.47           | 4.93           | 6.99     | -               | -              | -              | -       | 9.21               | -              | -              | -       |
| 24. | L <sub>9</sub> × T <sub>2</sub>  | 41.07**        | 14.52          | 38.74**        | 31.22**  | 24.60**         | 1.03           | 26.20*         | 16.89** | 28.64**            | -              | 6.62           | 11.50*  |
| 25. | L <sub>10</sub> × T <sub>2</sub> | -33.97**       | 3.53           | 9.62           | -7.96*   | -               | -              | -              | -       | -                  | 7.10           | 17.78*         | 3.20    |
| 26. | L <sub>11</sub> × T <sub>2</sub> | 39.07**        | 50.72**        | 36.74**        | 42.15**  | 25.16*          | 26.30*         | 19.26          | 23.69** | -                  | -              | -              | -       |
| 27. | L <sub>12</sub> × T <sub>2</sub> | -21.70**       | -3.81          | 14.62          | -5.05    | -               | -              | -              | -       | -                  | -              | -              | -       |
| 28. | L <sub>13</sub> × T <sub>2</sub> | -23.81**       | 2.45           | 11.30          | -4.59    | -               | -              | -              | -       | -                  | -              | -              | -       |
| 29. | L <sub>14</sub> × T <sub>2</sub> | 5.60           | 10.53          | 38.18**        | 18.01**  | -               | -              | 15.50          | 1.97    | -                  | -              | 19.01*         | 4.41    |
| 30. | L <sub>15</sub> × T <sub>2</sub> | -5.96          | 15.27          | 34.30**        | 14.03**  | -               | 0.87           | 15.47          | -       | -                  | -              | 11.07          | 0.32    |
| 31. | L <sub>1</sub> × T <sub>3</sub>  | 11.44          | -13.07         | -16.19*        | -6.24    | 9.61            | -              | -              | -       | 11.45              | -              | -              | -       |
| 32. | L <sub>2</sub> × T <sub>3</sub>  | 16.24          | -16.70*        | -9.47          | -4.58    | 0.79            | -              | -              | -       | -                  | -              | -              | -       |
| 33. | L <sub>3</sub> × T <sub>3</sub>  | 1.62           | -24.49**       | -11.76         | -11.78** | -               | -              | -              | -       | 15.56              | -              | -              | -       |
| 34. | L <sub>4</sub> × T <sub>3</sub>  | 13.19          | -19.09*        | -13.19         | -6.87    | 8.29            | -              | -              | -       | 6.51               | -              | -              | -       |
| 35. | L <sub>5</sub> × T <sub>3</sub>  | 22.53**        | -5.43          | 3.77           | 5.92     | 14.15           | -              | -              | -       | 12.26              | 3.02           | 1.81           | 6.25    |
| 36. | L <sub>6</sub> × T <sub>3</sub>  | 12.95          | 5.03           | 16.76*         | 11.30*   | -               | -              | -              | -       | -                  | 3.91           | 5.05           | 1.73    |
| 37. | L <sub>7</sub> × T <sub>3</sub>  | -0.21          | -16.06*        | -10.91         | -9.08*   | -               | -              | -              | -       | 14.96              | -              | -              | 1.16    |
| 38. | L <sub>8</sub> × T <sub>3</sub>  | 10.63          | -24.25**       | 26.09**        | 3.60     | 2.28            | -              | 13.23          | 0.30    | 18.47*             | -              | 26.35**        | 8.89    |
| 39. | L <sub>9</sub> × T <sub>3</sub>  | 23.37**        | -7.98          | 6.71           | 6.88     | 20.45*          | -              | -              | 0.39    | 24.35**            | -              | 4.62           | 9.00    |
| 40. | L <sub>10</sub> × T <sub>3</sub> | -21.93**       | -33.48**       | -18.47**       | -24.52** | -               | -              | -              | -       | 4.29               | -              | 4.87           | -       |
| 41. | L <sub>11</sub> × T <sub>3</sub> | 25.77**        | 27.39**        | 3.25           | 18.70**  | 3.35            | -              | -              | -       | 1.65               | 4.11           | -              | -       |
| 42. | L <sub>12</sub> × T <sub>3</sub> | -34.15**       | -14.58*        | 1.31           | -16.37** | -               | -              | -              | -       | -                  | -              | 7.77           | -       |
| 43. | L <sub>13</sub> × T <sub>3</sub> | -7.17          | -16.18*        | -9.10          | -10.76*  | -               | -              | -              | -       | 1.86               | -              | -              | -       |
| 44. | L <sub>14</sub> × T <sub>3</sub> | 11.99          | 13.27          | 15.50*         | 13.64**  | 8.62            | 5.49           | 11.07          | 10.41*  | 13.67              | 19.53*         | 23.94**        | 19.87** |
| 45. | L <sub>15</sub> × T <sub>3</sub> | -4.78          | -8.71          | -20.93**       | -11.57** | -               | -              | -              | -       | -                  | -              | -              | -       |

\*, \*\* Significant at 5% and 1% respectively
